# Supplementary material for: Study on the photophysical and electrochemical property and molecular simulation of broadly absorbing and emitting perylene diimide derivatives with large D–π–A structure
Source: Royal Society of Chemistry journal article supplement (doi:10.1039/c4ra07288j), 2014-01-01
Supplement: c4ra07288j1.pdf [file c4ra07288j1.pdf]

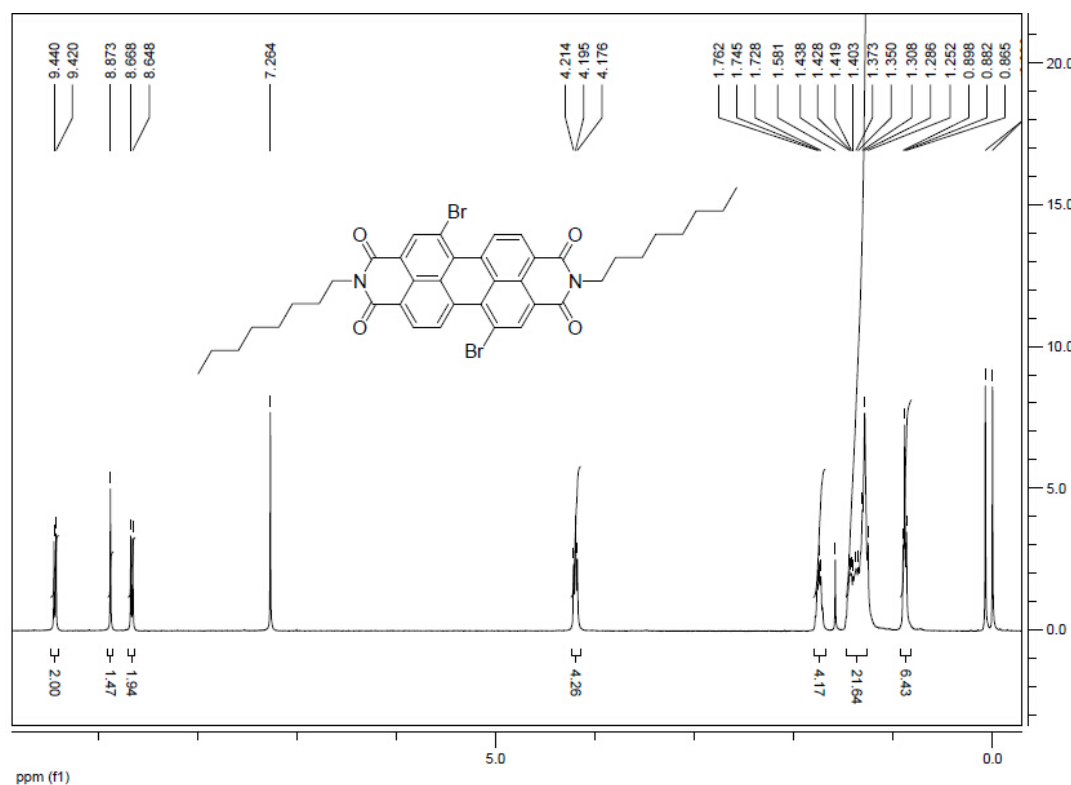

Figure a The <sup>1</sup>H-NMR chart of intermediate **Br-PDI**

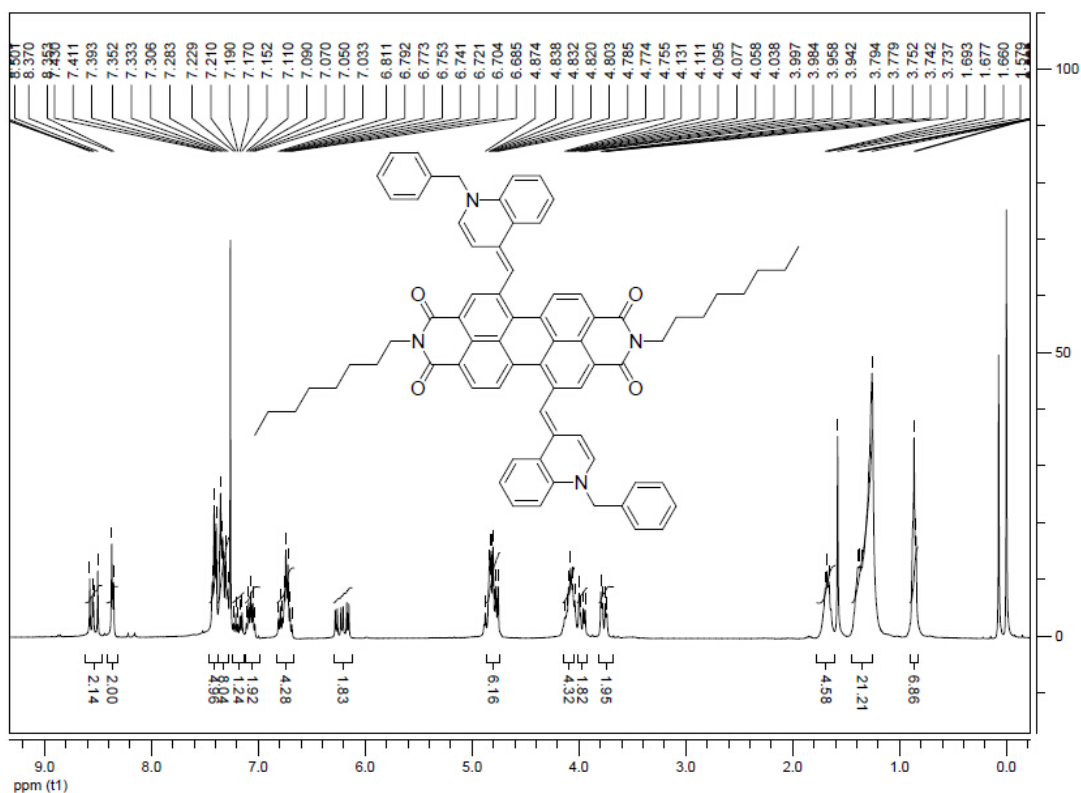

Figure b The <sup>1</sup>H-NMR chart of compound **C1**

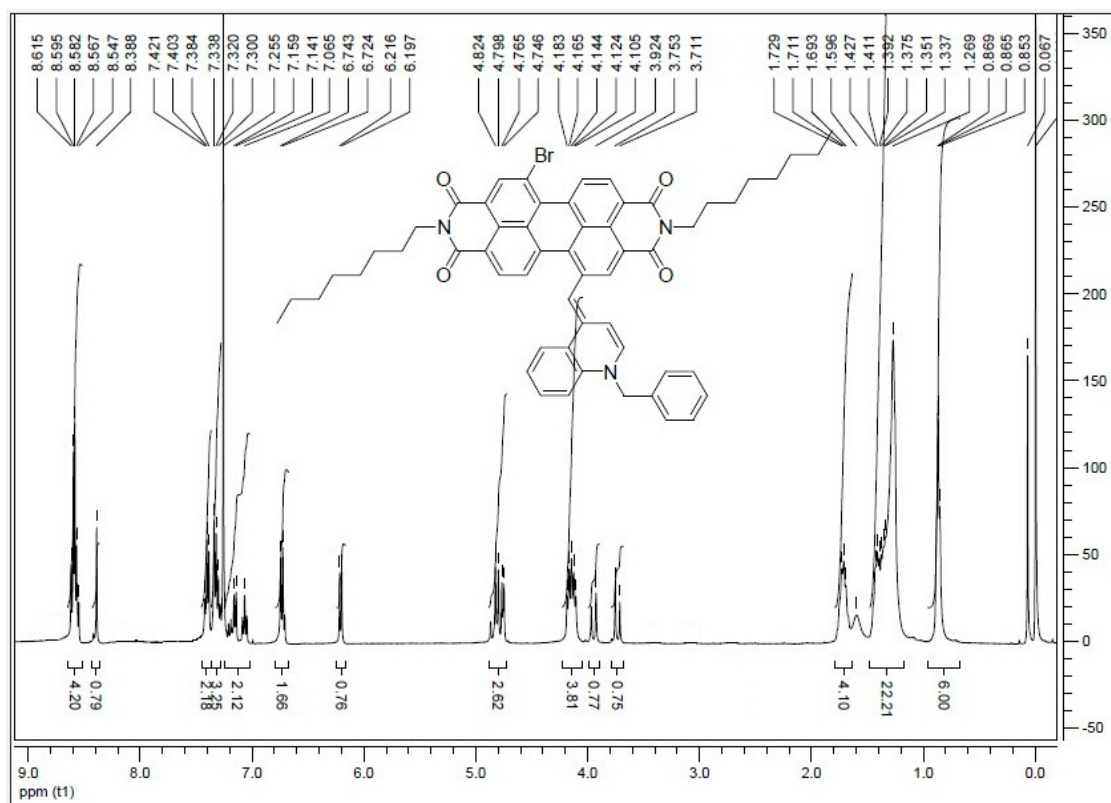

Figure c The <sup>1</sup>H-NMR chart of compound C2

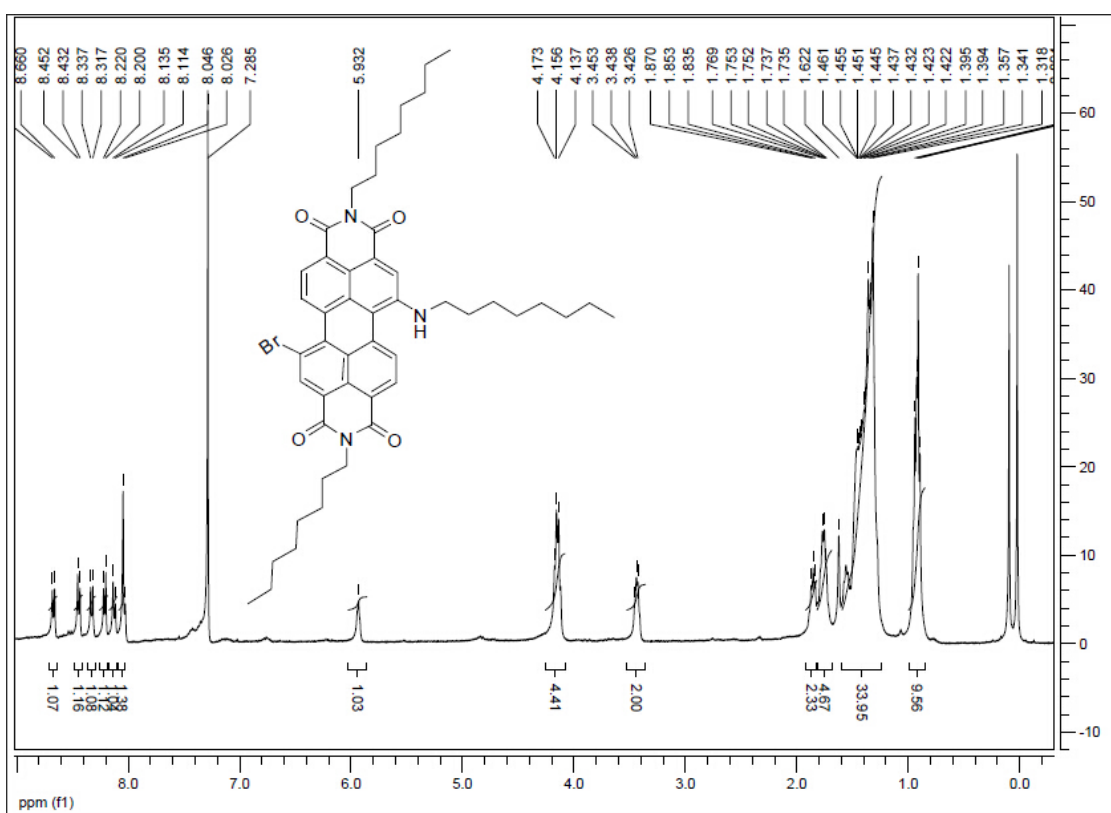

Figure d The <sup>1</sup>H-NMR chart of compound C3
